# Supplementary material
Source: PubMed Central journal article supplement (PMC2323347)
Supplement: pcbi.0040023.sg001.pdf [file pcbi.0040023.sg001.pdf]

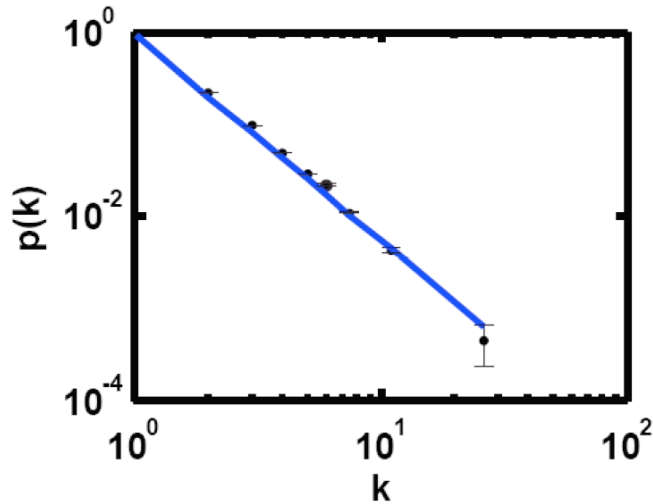

**Figure S1. Distribution of molecules in reactions**

Probability distribution  $p(k)$  that a molecule participates in  $k$  reactions, compiled from 80 runs to depth 1,000 in a dynamic environment. The distribution is fit to a power law  $p(k) \sim k^{-\lambda}$ , with  $\lambda \approx 2.23$  ( $r^2 = 0.88$ ). Error bars are standard error. Variable bin sizes are determined by the threshold binning method [37], with a minimum of  $T=100$  points per bin.
