# Supplementary material
Source: PubMed Central journal article supplement (PMC2323347)
Supplement: pcbi.0040023.sg002.pdf [file pcbi.0040023.sg002.pdf]

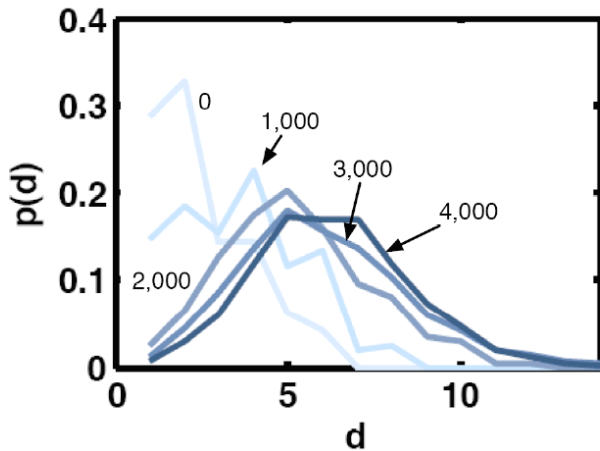

### Figure S2. Evolution of path length distribution

Evolution of the distribution  $p(d)$ , the probability to find two nodes in the network that are a distance  $d$  apart, for every 1,000<sup>th</sup> network on the line of descent, for a network evolved in a dynamic environment.
