# Supplementary material
Source: PubMed Central journal article supplement (PMC2323347)
Supplement: pcbi.0040023.sg003.pdf [file pcbi.0040023.sg003.pdf]

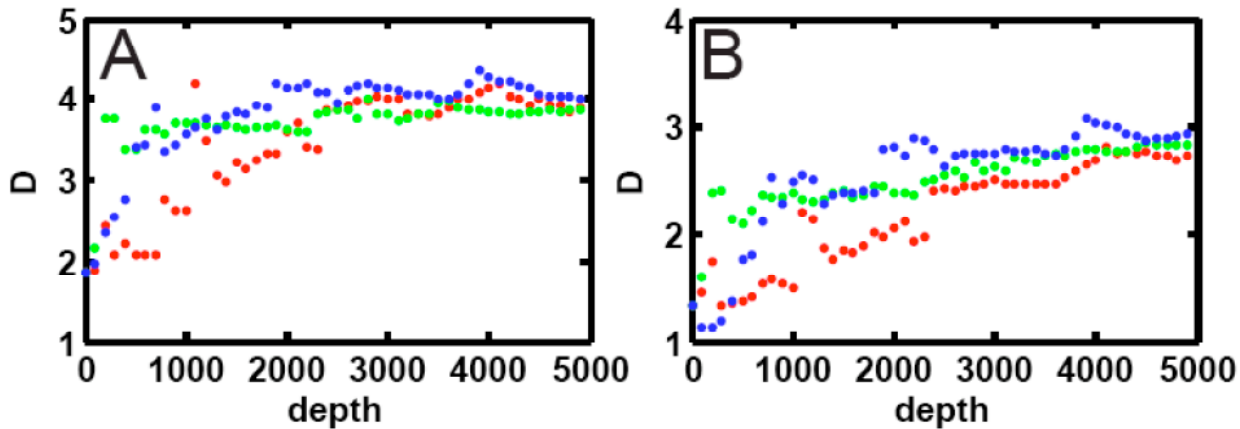

**Figure S3. Average path length  $D$  on the line of decent**

Mean path length  $D$  (see Methods) for a network with (A) metabolic, and (B) protein-protein annotation, in three different environments, for the network evolution shown in Fig. 2. Green: static, blue: quasi-static, and red: dynamic environment.
