# Supplementary material
Source: PubMed Central journal article supplement (PMC2323347)
Supplement: pcbi.0040023.sg004.pdf [file pcbi.0040023.sg004.pdf]

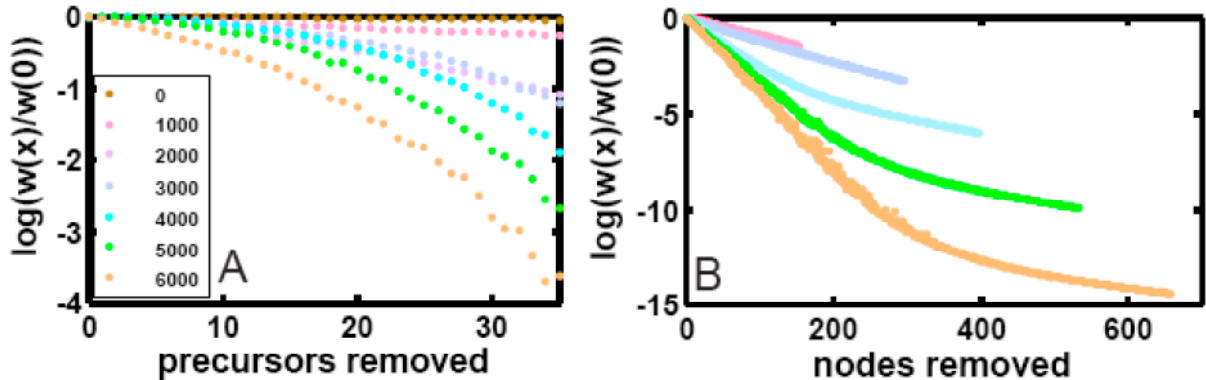

**Figure S4. Robustness of fitness under precursor and gene removal**

Decrease of normalized log fitness with increasing (A) precursor removal, (B) node removal, as a function of the position on the line of descent (colors in inset of panel A). Depth 0: ancestor.
