# Supplementary material
Source: PubMed Central journal article supplement (PMC2323347)

### Figure S5. Modularity analysis for static and quasi-static environments

Analysis of the separation of pairs of genes from networks evolved in an (A) static and (B) quasi-static environment, as in Fig. 8A. Red line: synthetic lethal pairs, green: dosage rescue pairs, black: random pairs and grey: relative size of largest connected component.

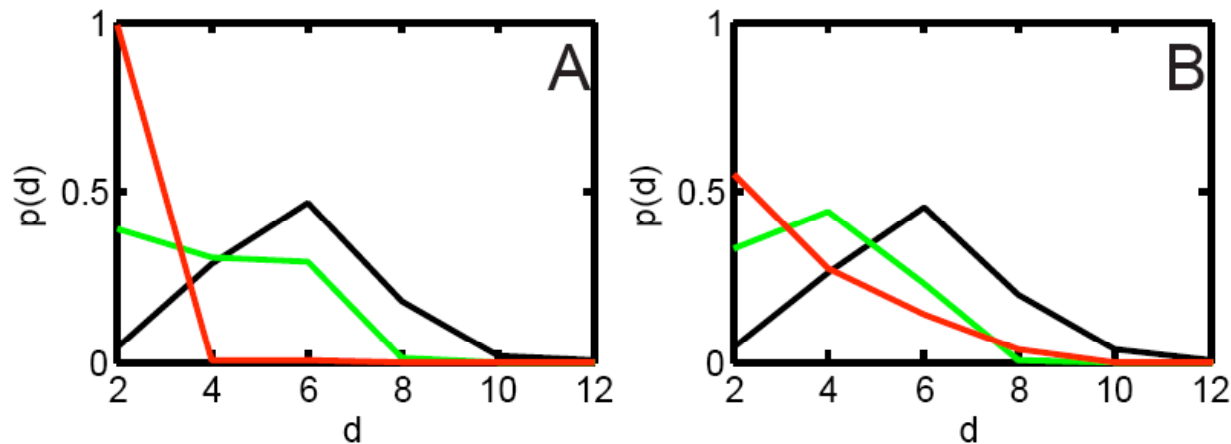

Supplement: pcbi.0040023.sg005.pdf [file pcbi.0040023.sg005.pdf]
