# Supplementary material
Source: PubMed Central journal article supplement (PMC2323347)
Supplement: pcbi.0040023.sg006.pdf [file pcbi.0040023.sg006.pdf]

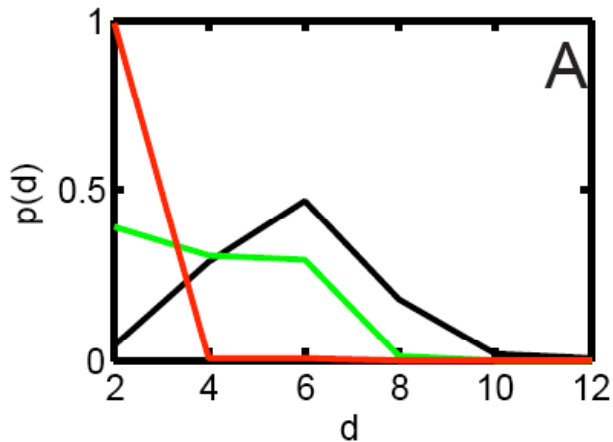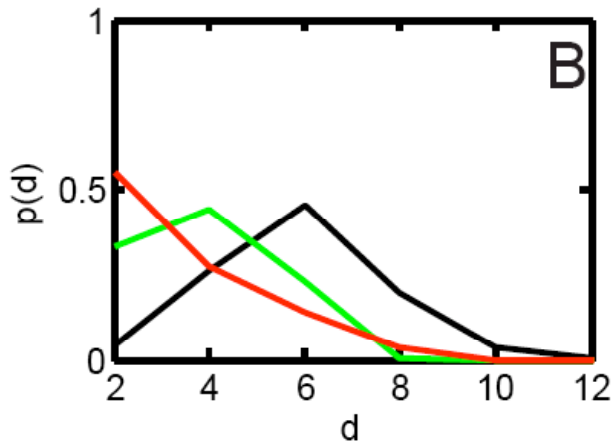

**Figure S6. Distance distribution of pairs of genes**

Distance distribution of pairs on a network evolved in (A) static and (B) quasi-static environment. Red: synthetic lethal pairs, green: knockdown suppressor pairs, black: random pairs.
