# Supplementary material
Source: PubMed Central journal article supplement (PMC2323347)
Supplement: pcbi.0040023.sg007.pdf [file pcbi.0040023.sg007.pdf]

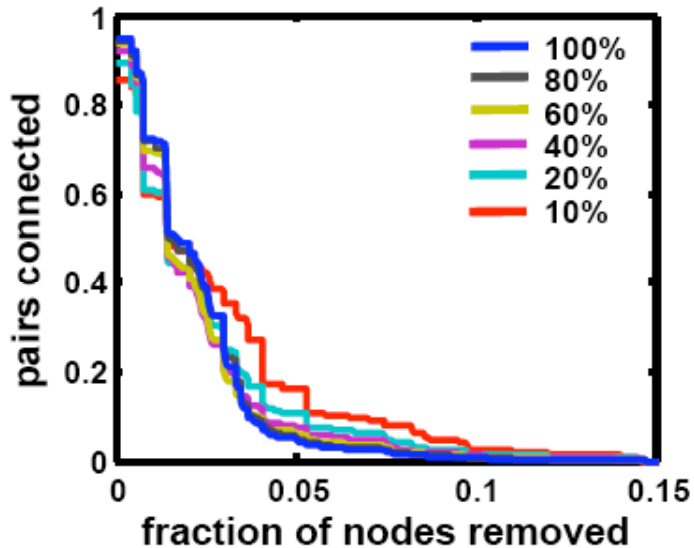

**Figure S7. Robustness of decay of knockdown suppressor pairs**

Fraction of knockdown suppressor pairs separated upon removing nodes with high BC using all (100%, weakest criterion) or fewer (only the top 10-80%) of suppressor pairs. The top 95% of pairs were used for Figures 8A and S5. See legend for colors and thresholds.
