# Supplementary material
Source: PubMed Central journal article supplement (PMC2323347)
Supplement: pcbi.0040023.sg008.pdf [file pcbi.0040023.sg008.pdf]

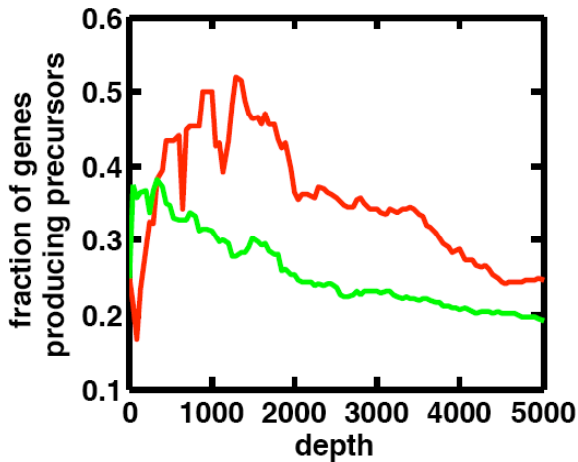

**Figure S8. Fraction of genes producing precursors**

Fraction of genes involved in the production of one of the 53 precursor molecules for the network evolved in a dynamic environment (red) vs. a static environment (green line).
