# Supplementary material
Source: PubMed Central journal article supplement (PMC2323347)
Supplement: pcbi.0040023.st001.pdf [file pcbi.0040023.st001.pdf]

**Table S1. Organization of a 72 bp gene**

| Base pair | Parameter                                                                                                              |
|-----------|------------------------------------------------------------------------------------------------------------------------|
| 0-3       | Start                                                                                                                  |
| 4-7       | Expression level (converted to real number between 0 and 1)                                                            |
| 8-11      | Type of protein, obtained by taking the base 4 modulus of the sequence. 00=import, 01=export, 10=reaction, 11=reaction |
| 12-23     | Specificity of protein                                                                                                 |
| 24-35     | Affinity domain 1                                                                                                      |
| 36-47     | Affinity domain 2                                                                                                      |
| 48-59     | Affinity domain 3                                                                                                      |
| 60-71     | Affinity domain 4                                                                                                      |
